1 Intermittent low-intensity far-UVC irradiation inhibits growth of common mold below threshold limit

2 value

3

4 Emilie Hage Mogensen<sup>1\*</sup>, Christian Kanstrup Holm<sup>1,2</sup>

5

6 <sup>1</sup>Science and Technology, UV Medico A/S, Aabyhoej, Denmark

7 <sup>2</sup>Department of Biomedicine, Aarhus University, Aarhus, Denmark

8 \* Corresponding author

9 E-mail: [emo@uvmedico.com](mailto:emo@uvmedico.com) (EHM)

## 10 **Abstract**

11 Mold infestations in buildings pose significant challenges to human health, affecting both private  
12 residences and hospitals. While molds commonly trigger asthma and allergies in the immunocompetent,  
13 they can cause life-threatening diseases in the immunocompromised. Currently, there is an unmet need  
14 for new strategies to reduce or prevent mold infestations. Far-UVC technology can inactivate  
15 microorganisms while remaining safe for humans. This study investigates the inhibitory efficacy of far-  
16 UVC light at 222 nm on the growth of common mold-producing fungi, specifically *Penicillium*  
17 *candidum*, when delivered in low-dose on-off duty cycles, a configuration consistent with its use in real-  
18 world settings. The inhibitory effect of the low-dose duty cycles was assessed on growth induced by i)  
19 an adjacent spore-producing *P. candidum* donor and ii) *P. candidum* spores seeded directly onto agar  
20 plates. In both setups, the far-UVC light significantly inhibited both vertical and horizontal growth of *P.*  
21 *candidum*, even when the UV doses were below the Threshold Value Limit of 23 mJ/cm<sup>2</sup>. These results  
22 suggest that far-UVC light holds the potential to improve indoor air quality by reducing or preventing  
23 mold growth, also when people are present.

## 24 **Introduction**

25 Fungi can be found both indoors and outdoors, and they thrive in a broad range of conditions, spanning  
26 diverse temperatures. High humidity and water activity are prerequisites for their optimal growth [1].  
27 Filamentous fungi can form spore-producing molds, and typically, outdoor levels of fungal spores  
28 exceed indoor levels [2], unless there is a source such as wall or floor mold patches [3]. A study  
29 conducted on buildings exposed to prolonged water leaks and increased humidity showed that  
30 *Penicillium* species were the most common species isolated from water-damaged materials, followed by  
31 *Aspergillus* and *Chaetomium* as the subsequent most commonly identified species [4]. Mold growth can  
32 lead to significant structural damage to buildings when it decomposes organic matter such as wood,  
33 wallpaper, cardboard, and linoleum [4].

34 When considering air quality, indoor mold or fungal growth can pose a significant challenge. The sick  
35 building syndrome encompasses various symptoms such as headaches, a blocked or runny nose, dry  
36 and itchy skin, as well as coughing. These symptoms manifest when susceptible individuals are inside  
37 specific buildings but tend to decrease after spending time outside of them. Different fungal species,  
38 including *Penicillium* [5, 6], have been associated with sick building syndrome symptoms. *Penicillium*  
39 is classified as Deuteromycetes, the same class as most other molds found in sick buildings [7], and  
40 exposure to *Penicillium* spp. in indoor environments can increase the susceptibility to asthma [8] and  
41 allergies [6, 9] in certain populations. In hospitals, mold outbreaks can cause increased morbidity and  
42 mortality, particularly for immunocompromised patients [10]. To protect public health and avoid these  
43 adverse health effects, the World Health Organization recommends preventing or limiting microbial  
44 growth on indoor surfaces [11].

45

46 UVC light has been recognized for its germicidal efficacy for a century. Typically, mercury vapor light  
47 sources emitting light at 254 nm are used, but several precautions must be taken, as this light can  
48 damage skin and eyes. Within the UVC spectrum, far-UVC is defined to be within the 200-230 nm  
49 wavelength range, which includes krypton chloride excimer lamps that emit light at 222 nm. The KrCl  
50 lamps often contain filters to ensure that harmful wavelengths outside 222 nm are inhibited. Despite  
51 having a wavelength only 32 nm from conventional UV light at 254 nm, the properties of 222 nm are  
52 fundamentally different because of its high absorption in proteins [12]. Studies have demonstrated that  
53 far-UVC light can effectively inactivate microorganisms, including bacteria and viruses [12-15], while  
54 remaining safe for human and rodent skin [16-23] and eyes [24, 25]. The Threshold Limit Value (TLV)  
55 set by the International Commission on Non-Ionising Radiation Protection is 23 mJ/cm<sup>2</sup>, which  
56 represents the maximum allowable irradiation to which a worker can be exposed during an 8-hour  
57 working day. However, safety studies have led the American Conference of Governmental Industrial  
58 Hygienists to recommend a new TLV of 161 mJ/cm<sup>2</sup> for the eyes and of 479 mJ/cm<sup>2</sup> for the skin.

59 Studies have also demonstrated the ability of far-UVC light at 222 nm to inactivate various fungal  
60 species [12, 13, 26, 27], typically by using a single high dose for inactivation. However, in real-world  
61 settings, far-UVC lamps are often configured to cycle on and off, delivering intermittent low-intensity  
62 doses throughout the day. This approach keeps the UV dose, to which individuals are exposed, below  
63 the TLV. As a result, microorganisms experience intermittent low doses of far-UVC light instead of one  
64 large dose. Here we report how cycling low doses of far-UVC light inhibits the growth of *Penicillium*  
65 *candidum* on agar plates, both when it stems from airborne spores and when seeded directly onto agar  
66 plates.

## 67 **Material and methods**

### 68 **Far-UVC light source**

69 The far-UVC source used in this study was a krypton chloride excimer lamp (UV222™, UV Medico,  
70 Denmark), equipped with a filtered light source emitting light at 222 nm (Care222, Ushio, Japan). The  
71 filter blocked emissions outside the 222 nm peak. The lamp had an output of 120 mW, an emission  
72 angle of 60 degrees, and an intensity of 13.7  $\mu\text{W}/\text{cm}^2$  at a 1-meter distance from the lamp. The lamp  
73 was equipped with software (UV Medico, Denmark) that allowed for duty cycling configuration.

### 74 **Inhibition of *P. candidum* growth from airborne spores by far-UVC** 75 **light**

76 Two identical boxes (80 x 120 x 185 cm) were constructed, each equipped with a far-UVC lamp affixed  
77 to the ceiling. Air movement was ensured by the installation of a ventilation fan in one corner of each  
78 box. To maintain a constant humidity level of 80%, humidifiers (Camry CR 7952) were employed.  
79 Preparation of donor plates was done by inoculating Dichloran-Glycerol 18% (DG18) agar plates with  
80 *P. candidum* and letting them incubate at room temperature until the mycelium completely covered the  
81 agar surface. Subsequently, the donor plates were transferred to the boxes, one donor plate in each box,

82 accompanied by three to four sterile DG18 plates placed adjacent to each donor plate. The plates were  
83 left in the box for one to two weeks to allow the spores to induce growth on the adjacent agar plates.

84 The far-UVC lamp was positioned 178 cm away from the agar plates. At this distance, it delivered  
85 an intensity of  $4.4 \mu\text{W}/\text{cm}^2$  to the agar plates and was programmed to cycle on and off. The total  
86 accumulated UV doses and corresponding on/off cycles per 24 hours were as follows:  $25 \text{ mJ}/\text{cm}^2$  (1  
87 minute on and 14 minutes off),  $50 \text{ mJ}/\text{cm}^2$  (2 minutes on and 12 minutes off), and  $100 \text{ mJ}/\text{cm}^2$  (4  
88 minutes on and 11 minutes off). In one box, the lamp remained turned off all the time to serve as a  
89 control condition, and the control and far-UVC boxes were swapped each time the experiment was  
90 repeated. Multiple UV doses were screened, and the minimum dose ( $25 \text{ mJ}/\text{cm}^2$ ) was selected for  
91 additional repetitions, totaling four technical replicates at this low dose. The growth was monitored by  
92 measuring the covered area on the agar plates on the fourth day after the initial colony appeared.

### 93 **Inhibition of *P. candidum* growth from seeded spores by far-UVC light**

94 To further investigate the impact of cycling low doses of far-UVC light on mold growth, four identical  
95 boxes (63 x 125 x 140 cm) were built with a far-UVC lamp installed in the ceiling of each box.  
96 Humidifiers (Camry CR 7964) maintained the humidity at 80-90% within the boxes. *P. candidum*  
97 spores were dissolved in phosphate-buffered saline with a concentration of 2 mg/mL and transferred to  
98 DG18 agar plates in 8  $\mu\text{L}$  droplets, with six droplets on each plate. A seeded agar plate was positioned at  
99 the bottom of each box, directly under the far-UVC lamp. The distance between the lamp and the agar  
100 plate was 130 cm, resulting in an intensity of  $8.16 \mu\text{W}/\text{cm}^2$  being delivered to the agar plate. The  
101 accumulated UV doses and corresponding cycles per 24 hours were as follows:  $10 \text{ mJ}/\text{cm}^2$  (13 seconds  
102 on and 14 minutes and 47 seconds off),  $15 \text{ mJ}/\text{cm}^2$  (19 seconds on and 14 minutes and 41 seconds off),  
103 and  $20 \text{ mJ}/\text{cm}^2$  (26 seconds on and 14 minutes and 34 seconds off). The agar plates were incubated in  
104 the boxes for seven days, and four technical replicates were conducted. The growth was monitored daily  
105 by capturing pictures for visual assessment and by measuring the increase in diameter of all seeded  
106 droplets.

## 107 **Statistical analysis**

108 Unpaired Welch's t-tests were performed, assuming parametric data distribution. The tests were  
109 conducted to evaluate the difference in growth of *P. candidum* under control conditions versus far-UVC  
110 irradiated conditions, with the growth stemming both from airborne spores and spores seeded directly  
111 onto an agar plate. The statistical level of significance was set to 5%, and data was analyzed in  
112 GraphPad Prism version 10.0.3.

## 113 **Results**

### 114 **Far-UVC light at 222 nm inhibits growth of *P. candidum***

115 In the initial experiment, donor agar plates covered with *P. candidum* mycelium were placed in boxes  
116 with 80% humidity, and air movement was ensured by a fan to spread airborne spores. Sterile receiver  
117 agar plates were positioned adjacently to the donor plates, a far-UVC lamp was installed in the ceiling of  
118 each box, as depicted in Fig 1A. The total UV doses accumulated over 24-hour periods during each of  
119 three duty cycles were 100, 50, and 25 mJ/cm<sup>2</sup>, respectively. As a control, the far-UVC lamp was turned  
120 off in one of the boxes. Fig 1B displays representative images of the growth on the plates, both under  
121 far-UVC irradiation (lower plates) and non-irradiated control plates (upper plates). In total, 74% of the  
122 control plates showed visible growth, with an average of 21.7% of the agar surface being covered by  
123 mycelium (Fig 1C) four days after the initial colony appeared. In contrast, none of the plates in the 100  
124 or 50 mJ/cm<sup>2</sup> conditions showed any growth. As the lowest dose of 25 mJ/cm<sup>2</sup> exhibited a comparable  
125 inhibitory effect to the higher doses, we conducted this condition four times for verification. A third of  
126 the far-UVC-irradiated plates showed growth, but only as minor colonies, and the total surface area  
127 covered on any of the plates never exceeded 1%. This result suggests that applying far-UVC light in  
128 duty cycles can effectively inhibit the growth of *P. candidum*.

129 **Fig 1. Far-UVC inhibits *P. candidum* growth induced by airborne spores.** A donor plate covered  
130 with *P. candidum* was placed in a box with 80% humidity, air movement, and a far-UVC lamp, and  
131 recipient plates were positioned adjacently to the donor plate (A). Accumulated doses of cycling far-  
132 UVC light were 25, 50, and 100 mJ/cm<sup>2</sup> per 24 hours. Representative pictures show fungal growth on  
133 the recipient agar plates with and without far-UVC light (B). The growth was monitored by measuring  
134 the percentage of the agar surface covered by mycelium (C). The mean percentage values for surface  
135 coverage were 21.7% (control), <1% (25 mJ/cm<sup>2</sup>), 0% (50 mJ/cm<sup>2</sup>), and 0% (100 mJ/cm<sup>2</sup>). Statistical  
136 analysis was performed using unpaired Welch's t-test, with the asterisks indicating a p-value of 0.0005.  
137 The p-values for 50, and 100 mJ/cm<sup>2</sup> conditions versus control were both 0.0005 (not shown in the  
138 figure). Columns indicate mean values with standard deviation, and each dot represents a recipient agar  
139 plate. The results indicate that cycling far-UVC light can inhibit mold growth, even when the dose is  
140 only 25 mJ/cm<sup>2</sup> per 24 hours.

## 141 **Growth inhibition can be achieved by using doses below the current** 142 **TLV**

143 In the second experiment, we proceeded to assess the effect of duty cycles with low doses of far-UVC  
144 light below the TLV. Agar plates seeded with droplets of *P. candidum* spores in solution were placed in  
145 boxes with 80-90% humidity and with far-UVC lamps in the ceiling as depicted in Fig 2A. The growth  
146 was monitored for one week. The total accumulated UV doses for 24-hour periods were 20, 15, 10, and  
147 0 (control) mJ/cm<sup>2</sup>, respectively. Under non-irradiated control conditions, the spots increased their  
148 diameter by  $3.28 \pm 0.96$  mm after seven days (Fig 2B). In contrast, the lowest UV dose duty cycles (10  
149 and 15 mJ/cm<sup>2</sup>) showed only  $0.53 \pm 0.42$  mm and  $0.25 \pm 0.30$  mm increases in diameter after seven  
150 days, respectively. For 20 mJ/cm<sup>2</sup>, no growth was observed.

151 The most rapid growth increase occurred during the first five days, and representative pictures of  
152 the growth development are presented in Fig 2C. In the non-irradiated control condition, hyphae

153 stretched out around the seeded spot, along with vertical growth and a denser mycelium after three to  
154 five days. Although there was a slight increase in diameter during the 10 and 15 mJ/cm<sup>2</sup> conditions, the  
155 growth appeared markedly different, lacking both a hyphae circle around the spot and visible vertical  
156 growth. No change was observed in the 20 mJ/cm<sup>2</sup> condition. This result suggests that the growth of *P.*  
157 *candidum* is inhibited by far-UVC light at doses below the TLV of 23 mJ/cm<sup>2</sup>.

158 **Fig 2. Far-UVC inhibits both vertical and horizontal growth of *P. candidum*.** *P. candidum* spores  
159 were seeded onto agar plates and left to grow in 80-90% humidity for seven days while being exposed  
160 to far-UVC light (A). Growth was monitored daily by measuring diameter increases (B, C) and through  
161 visual assessment (C). After seven days, the mean diameter increases were  $3.28 \pm 0.96$ ,  $0.53 \pm 0.42$ ,  
162  $0.25 \pm 0.30$  and 0.0 mm for control, 10, 15, and 20 mJ/cm<sup>2</sup>, respectively. Growth in the non-irradiated  
163 control condition was significantly higher (Welch's unpaired t-test p-value <0.001) compared to any of  
164 the irradiated samples. The representative images (C) show hyphal growth starting after three days in the  
165 control box, in contrast to all the far-UVC irradiated samples. The results suggest that cycling doses  
166 below the TLV inhibit mold growth of *P. candidum*.

## 167 Discussion

168 This study aimed to assess the inhibiting effect of far-UVC light applied in low-dose duty cycles on  
169 growing mold, and we found that the light significantly inhibited the growth of *P. candidum*.

170 UVC light emitted from conventional mercury lamps is well-known for its antimicrobial  
171 properties, but its use is limited to areas without people present due to health hazards, including the risk  
172 of causing skin and eye damage [28]. Consequently, the conventional UVC light is typically  
173 administered in one large dose while no people are present or used for upper-room decontamination.  
174 Most knowledge of UVC light applied for decontamination is based on a century of use of this method.  
175 The development of excimer lamps emitting far-UVC light at 222 nm, which is safe for human  
176 exposure as described in the introduction, has opened doors to a range of new applications. Currently,



177 we are learning how to use far-UVC light for decontamination while people are present, ensuring that  
178 the TLV is never exceeded. This involves delivering the light in intermittent low doses throughout the  
179 day. However, most studies are based on applying single large doses [12], as was customary when  
180 applying conventional UVC light, typically at 254 nm.

181 In this study, we found that intermittent cycling doses can effectively inhibit growth, even at low  
182 doses below the TLV of 23 mJ/cm<sup>2</sup>. These results suggest that far-UVC light can be a valuable tool in  
183 environments prone to mold attacks and could be used as a chemical-free supplement to manual  
184 cleaning.

185

186 A study of 16,190 people in Denmark, Estonia, Iceland, Norway, and Sweden revealed a prevalence of  
187 damp indoor environments of 18%, with a higher occurrence of respiratory symptoms and asthma  
188 among those living in damp housing [29]. Another study estimated that approximately 50% of residents  
189 of homes in the USA are at higher risk of experiencing respiratory symptoms due to exposure to  
190 dampness and/or mold in their homes [30]. The risk was not limited to homes but extended to schools,  
191 offices, and other institutional buildings. In hospitals, mold outbreaks can cause fungal infections in  
192 vulnerable and immunocompromised patients without legitimate clinical explanations [10, 31, 32].  
193 Fungi-related health hazards primarily stem from airborne spores polluting the air. This study does not  
194 address the effect of far-UVC light on airborne spores directly, and there is a probability that the doses  
195 used here are too low to have a significant effect on the spores. Previously, the log 1 reduction dose for  
196 *Penicillium expansum* spores has been reported to be 11 mJ/cm<sup>2</sup> [27], applied as a single large dose.  
197 However, as indoor mold growth increases the risk of high concentrations of airborne spores, preventing  
198 growth on indoor surfaces is crucial to securing indoor air quality [11]. When the TLV is increased from  
199 23 mJ/cm<sup>2</sup> to 161 and 479 mJ/cm<sup>2</sup> for eyes and skin, respectively, an enhanced inactivating effect on  
200 fungi is most likely achievable. Further studies on far-UVC light in real-world settings should be

201 pursued to investigate if the light can enhance indoor air quality and prevent some of the symptoms  
202 associated with poor air quality.

## 203 **Conclusion**

204 Indoor damp environments are particularly susceptible to mold infestations, which can substantially  
205 decrease indoor air quality and trigger adverse health effects such as asthma and allergies, or cause life  
206 threatening diseases in vulnerable hospital patients. To protect public health, indoor mold outbreaks  
207 should be prevented. In this study, we investigated the inhibitory impact of far-UVC light on the growth  
208 of *P. candidum* mold. Our findings suggest that cycling far-UVC doses below the TLV of 23 mJ/cm<sup>2</sup>  
209 can effectively inhibit mold growth. This result emphasizes the potential of far-UVC light at 222 nm in  
210 protecting indoor environments and public health by inhibiting mold growth on indoor surfaces.

## 211 **References**

- 212 1. Horner WE, Helbling A, Salvaggio JE, Lehrer SB. Fungal allergens. Clin Microbiol Rev.  
213 1995;8(2):161-79.
- 214 2. Fairs A, Wardlaw AJ, Thompson, Jr., Pashley CH. Guidelines on ambient intramural airborne  
215 fungal spores. J Investig Allergol Clin Immunol. 2010;20(6):490-8.
- 216 3. Stern MA, Allitt U, Corden J, Millington W. The Investigation of Fungal Spores in Intramural Air  
217 Using a Burkard Continuous Recording Air Sampler. Indoor and Built Environment. 1999;8(1):40-8.
- 218 4. Gravesen S, Nielsen PA, Iversen R, Nielsen KF. Microfungal contamination of damp buildings--  
219 examples of risk constructions and risk materials. Environ Health Perspect. 1999;107 Suppl 3(Suppl  
220 3):505-8.
- 221 5. Schwab CJ, Straus DC. The roles of *Penicillium* and *Aspergillus* in sick building syndrome. Adv  
222 Appl Microbiol. 2004;55:215-38.

- 223 6. Meyer HW, Larsen FO, Jacobi HH, Poulsen LK, Clementsen P, Gravesen S, et al. Sick building  
224 syndrome: association of symptoms with serum IgE specific to fungi. *Inflamm Res.* 1998;47 Suppl  
225 1:S9-10.
- 226 7. Kurup VP, Shen HD, Banerjee B. Respiratory fungal allergy. *Microbes Infect.* 2000;2(9):1101-10.
- 227 8. Sharpe RA, Bearman N, Thornton CR, Husk K, Osborne NJ. Indoor fungal diversity and asthma: a  
228 meta-analysis and systematic review of risk factors. *J Allergy Clin Immunol.* 2015;135(1):110-22.
- 229 9. Lander F, Meyer HW, Norm S. Serum IgE specific to indoor moulds, measured by basophil  
230 histamine release, is associated with building-related symptoms in damp buildings. *Inflamm Res.*  
231 2001;50(4):227-31.
- 232 10. Denning DW. Global incidence and mortality of severe fungal disease. *Lancet Infect Dis.* 2024.
- 233 11. WHO. WHO guidelines for indoor air quality: dampness and mould. Geneva2009. 248 p.
- 234 12. Hessling M, Haag R, Sieber N, Vatter P. The impact of far-UVC radiation (200-230 nm) on  
235 pathogens, cells, skin, and eyes - a collection and analysis of a hundred years of data. *GMS Hyg Infect*  
236 *Control.* 2021;16:Doc07.
- 237 13. Narita K, Asano K, Naito K, Ohashi H, Sasaki M, Morimoto Y, et al. 222-nm UVC inactivates a  
238 wide spectrum of microbial pathogens. *J Hosp Infect.* 2020.
- 239 14. Buonanno M, Welch D, Shuryak I, Brenner DJ. Far-UVC light (222 nm) efficiently and safely  
240 inactivates airborne human coronaviruses. *Sci Rep.* 2020;10(1):10285.
- 241 15. Welch D, Buonanno M, Grilj V, Shuryak I, Crickmore C, Bigelow AW, et al. Far-UVC light: A  
242 new tool to control the spread of airborne-mediated microbial diseases. *Sci Rep.* 2018;8(1):2752.
- 243 16. Buonanno M, Ponnaiya B, Welch D, Stanislauskas M, Randers-Pehrson G, Smilenov L, et al.  
244 Germicidal Efficacy and Mammalian Skin Safety of 222-nm UV Light. *Radiat Res.* 2017;187(4):483-  
245 91.

- 246 17. Hickerson RP, Conneely MJ, Hirata Tsutsumi SK, Wood K, Jackson DN, Ibbotson SH, et al.  
247 Minimal, superficial DNA damage in human skin from filtered far-ultraviolet C. *Br J Dermatol*.  
248 2021;184(6):1197-9.
- 249 18. Yamano N, Kunisada M, Kaidzu S, Sugihara K, Nishiaki-Sawada A, Ohashi H, et al. Long-term  
250 Effects of 222-nm ultraviolet radiation C Sterilizing Lamps on Mice Susceptible to Ultraviolet  
251 Radiation. *Photochem Photobiol*. 2020;96(4):853-62.
- 252 19. Cadet J. Harmless Effects of Sterilizing 222-nm far-UV Radiation on Mouse Skin and Eye  
253 Tissues. *Photochem Photobiol*. 2020;96(4):949-50.
- 254 20. Welch D, Kleiman NJ, Arden PC, Kuryla CL, Buonanno M, Ponnaiya B, et al. No Evidence of  
255 Induced Skin Cancer or Other Skin Abnormalities after Long-Term (66 week) Chronic Exposure to  
256 222-nm Far-UVC Radiation. *Photochem Photobiol*. 2022.
- 257 21. Eadie E, Bamard IMR, Ibbotson SH, Wood K. Extreme Exposure to Filtered Far-UVC: A Case  
258 Study(†). *Photochem Photobiol*. 2021;97(3):527-31.
- 259 22. Fukui T, Niikura T, Oda T, Kumabe Y, Ohashi H, Sasaki M, et al. Exploratory clinical trial on the  
260 safety and bactericidal effect of 222-nm ultraviolet C irradiation in healthy humans. *PLoS One*.  
261 2020;15(8):e0235948.
- 262 23. Narita K, Asano K, Morimoto Y, Igarashi T, Nakane A. Chronic irradiation with 222-nm UVC  
263 light induces neither DNA damage nor epidermal lesions in mouse skin, even at high doses. *PLoS One*.  
264 2018;13(7):e0201259.
- 265 24. Kaidzu S, Sugihara K, Sasaki M, Nishiaki A, Ohashi H, Igarashi T, et al. Re-Evaluation of Rat  
266 Corneal Damage by Short-Wavelength UV Revealed Extremely Less Hazardous Property of Far-UV-  
267 C(†). *Photochem Photobiol*. 2021;97(3):505-16.
- 268 25. Sugihara K, Kaidzu S, Sasaki M, Ichioka S, Takayanagi Y, Shimizu H, et al. One-year Ocular  
269 Safety Observation of Workers and Estimations of Microorganism Inactivation Efficacy in the Room  
270 Irradiated with 222-nm Far Ultraviolet-C Lamps. *Photochem Photobiol*. 2022.

- 271 26. Schleusener J, Lohan SB, Busch L, Ghoreschi K, Ploch NL, May S, et al. Treatment of the  
272 *Candida* subspecies *Candida albicans* and *Candida parapsilosis* with two far-UVC sources to minimise  
273 mycoses in clinical practice. *Mycoses*. 2023;66(1):25-8.
- 274 27. Clauß M. Higher effectiveness of photoinactivation of bacterial spores, UV resistant vegetative  
275 bacteria and mold spores with 222 nm compared to 254 nm wavelength. *Acta hydrochimica et*  
276 *hydrobiologica*. 2006;34(6):525-32.
- 277 28. Milonova S, Rudnick S, McDevitt J, Nardell E. Occupant UV exposure measurements for upper-  
278 room ultraviolet germicidal irradiation. *J Photochem Photobiol B*. 2016;159:88-92.
- 279 29. Gunnbjörnsdóttir MI, Franklin KA, Norbäck D, Björnsson E, Gislason D, Lindberg E, et al.  
280 Prevalence and incidence of respiratory symptoms in relation to indoor dampness: the RHINE study.  
281 *Thorax*. 2006;61(3):221-5.
- 282 30. Mudarri D, Fisk WJ. Public health and economic impact of dampness and mold. *Indoor Air*.  
283 2007;17(3):226-35.
- 284 31. Dailly S, Boatswain E, Brooks J, Campbell G, Dallow K, Dushianthan A, et al. *Aspergillus* in  
285 COVID-19 intensive care unit; what is lurking above your head? *J Infect Prev*. 2022;23(6):278-84.
- 286 32. Kanamori H, Rutala WA, Sickbert-Bennett EE, Weber DJ. Review of fungal outbreaks and  
287 infection prevention in healthcare settings during construction and renovation. *Clin Infect Dis*.  
288 2015;61(3):433-44.  
289



A

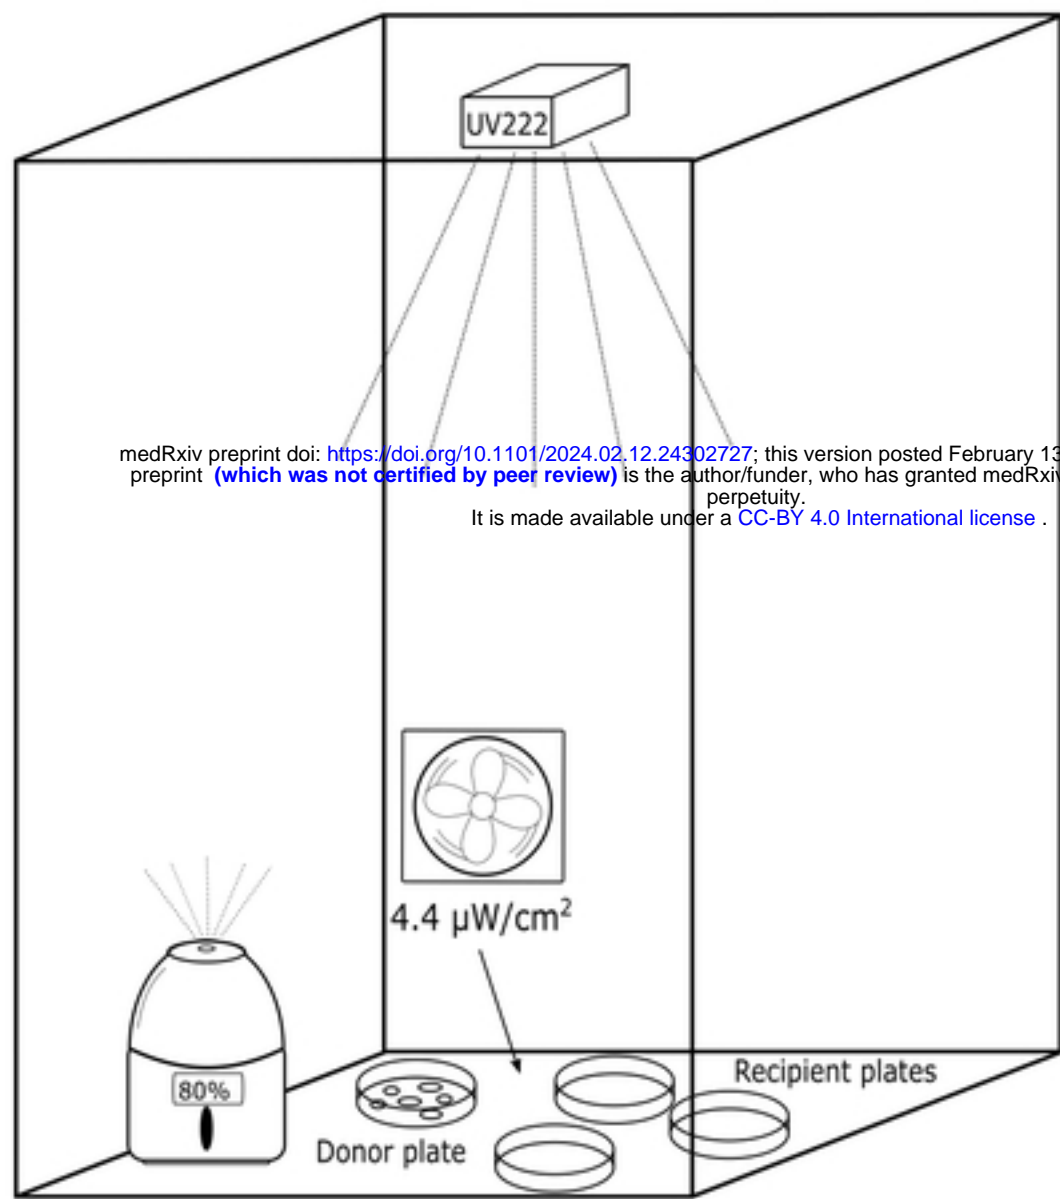

B

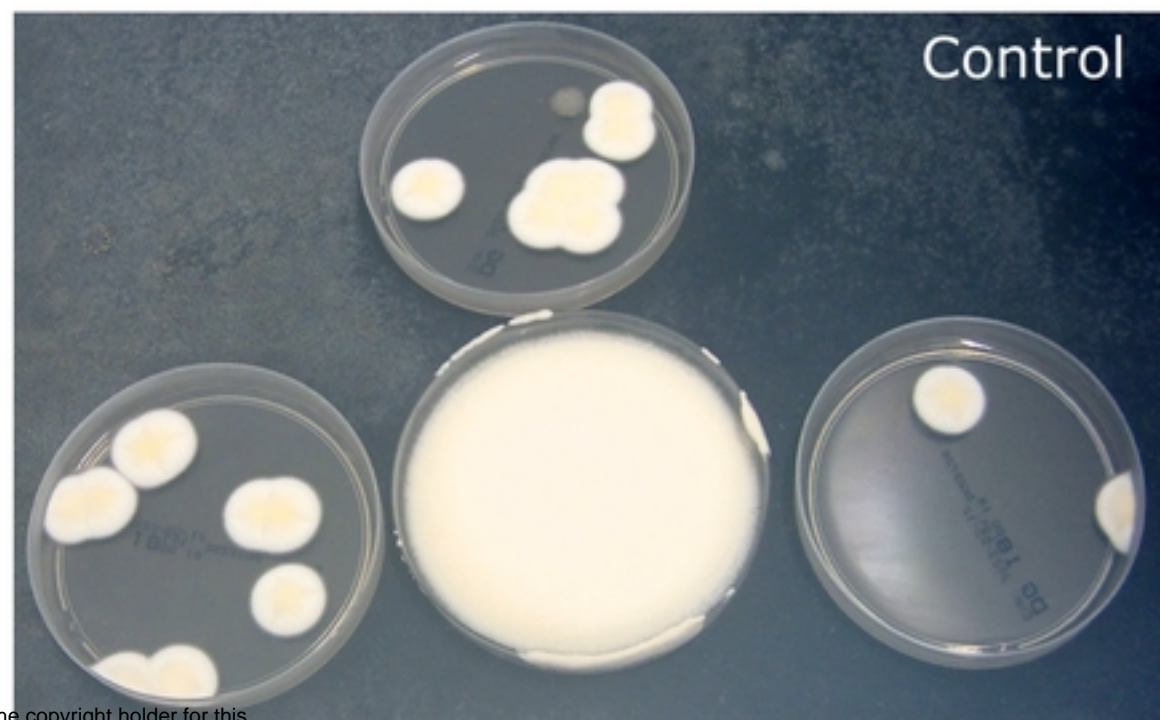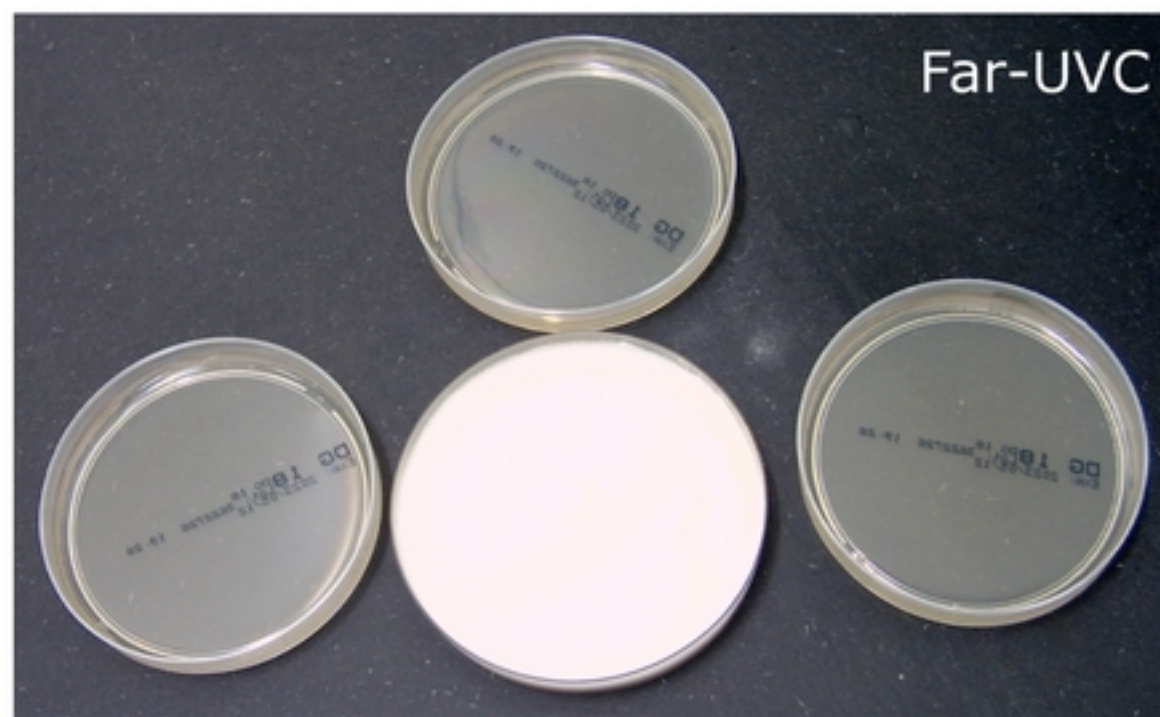

C

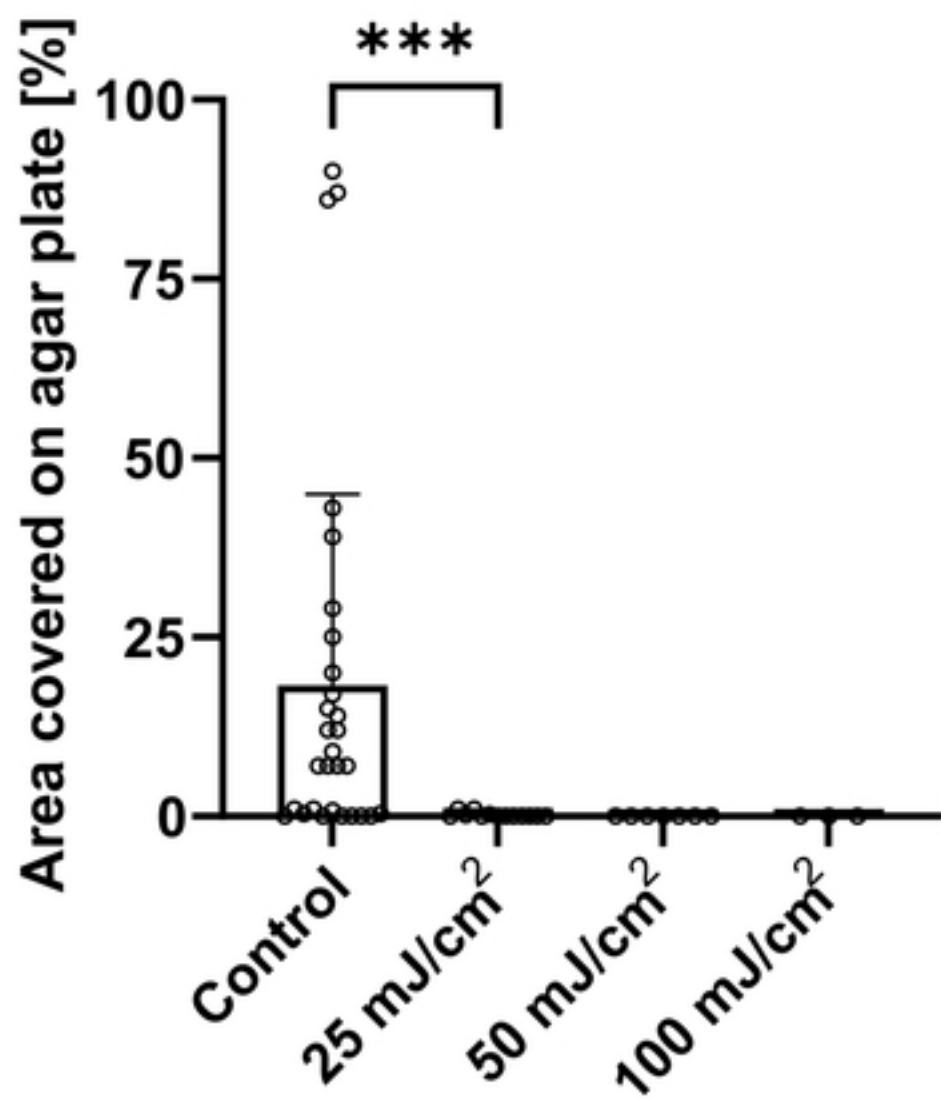

Figure 1



A

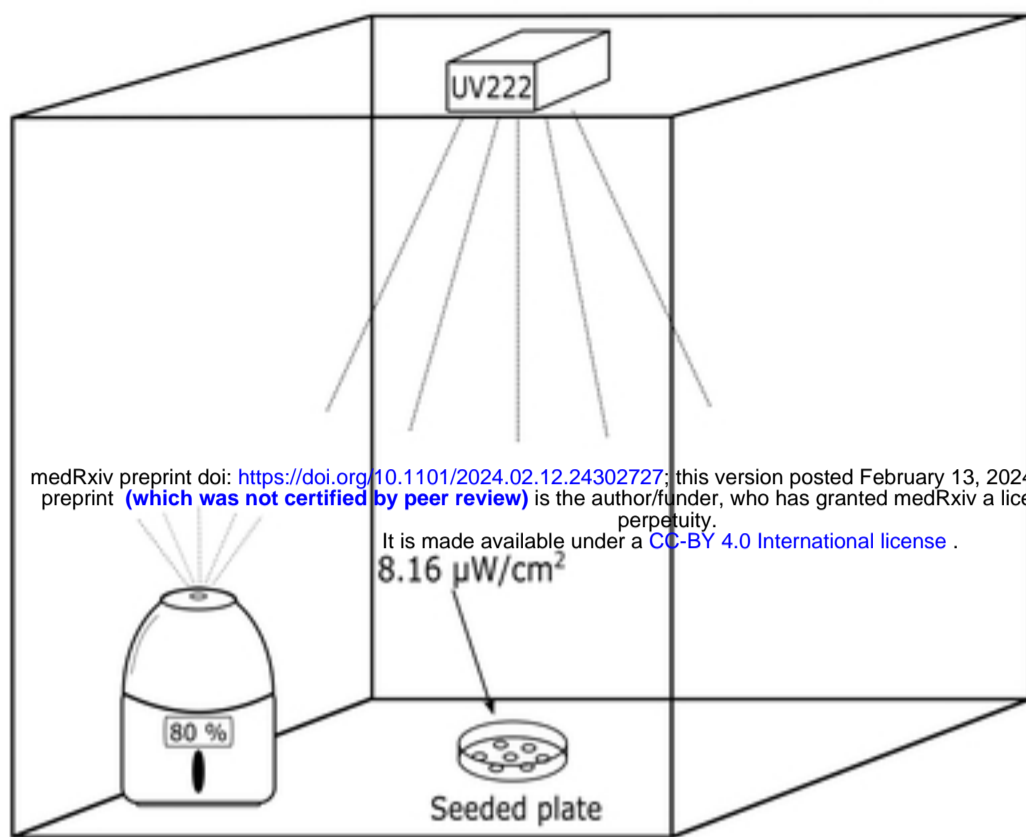

B

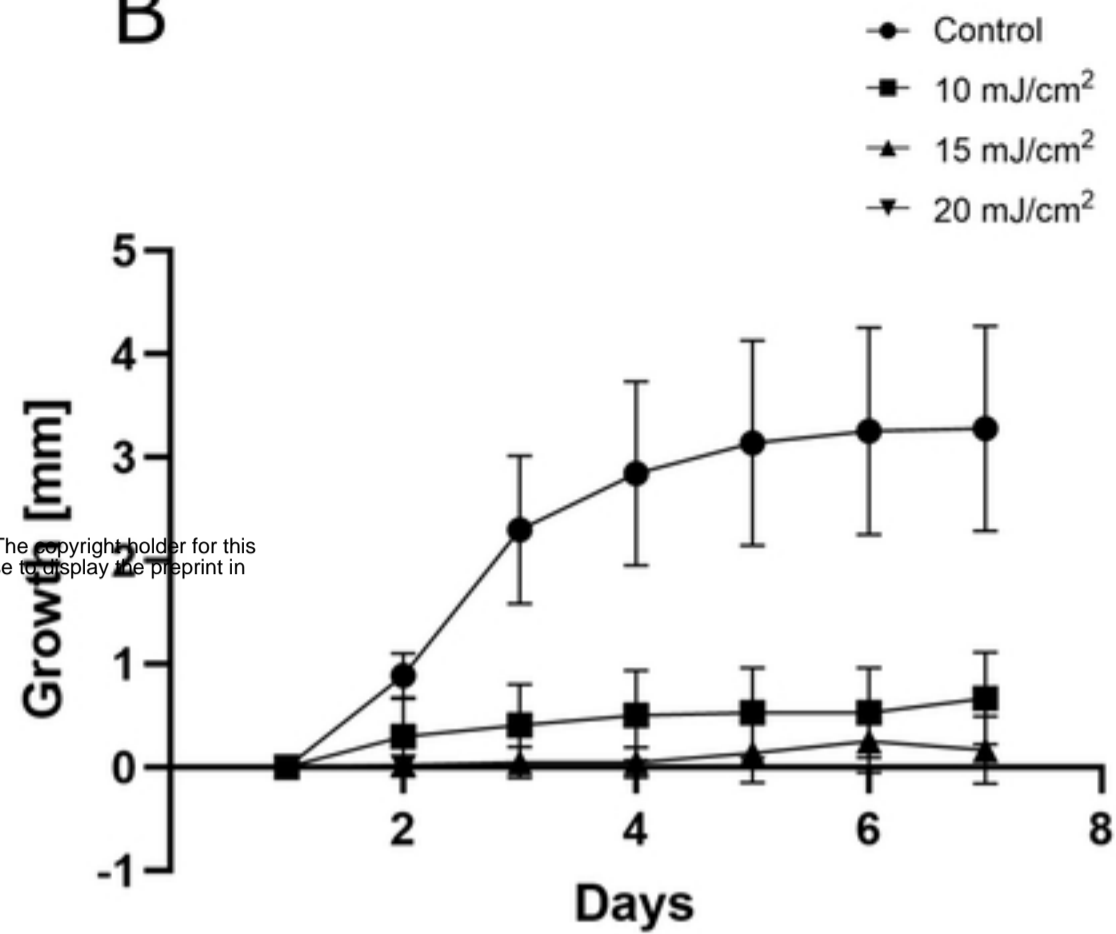

C

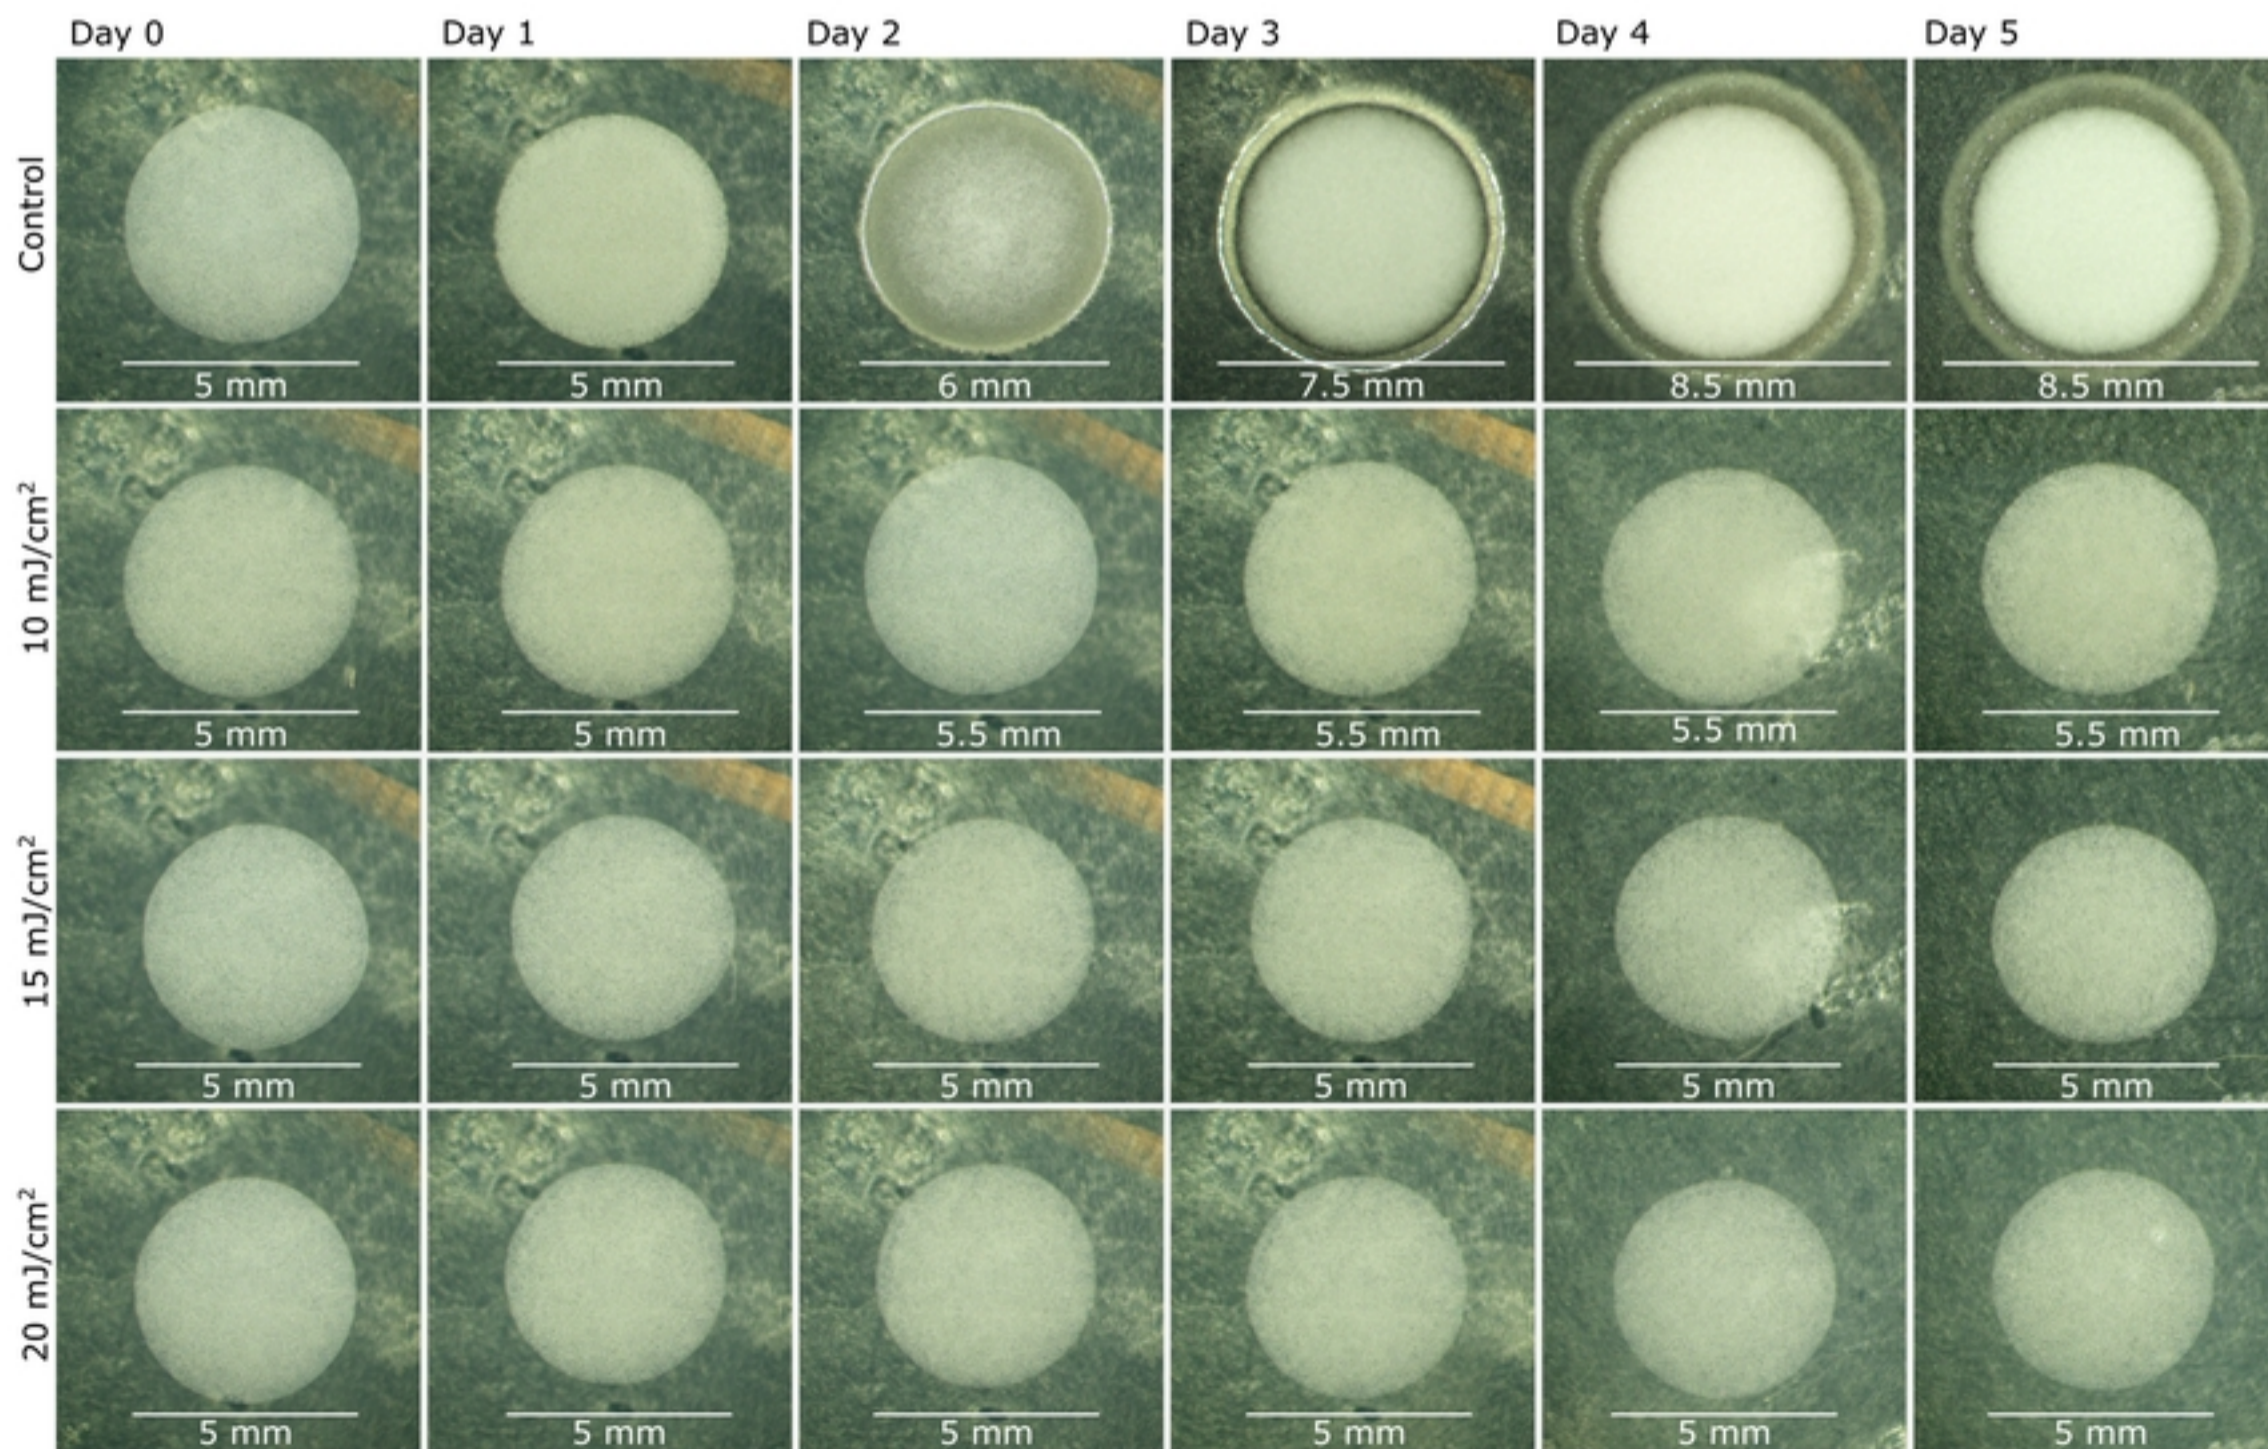

Figure2
